# Supplementary material
Source: publisher figshare collection journal article supplement (https://acs.figshare.com/ndownloader/files/3612660)
Supplement: Supplementary file 1 [file 3612660]

## Supplementary information

### Determinants for tRNA-dependent pre-transfer editing in the synthetic site of isoleucyl-tRNA synthetase

Morana Dulic<sup>1</sup>, John J. Perona<sup>2,3</sup> and Ita Gruić Sovulj<sup>1</sup>

From the <sup>1</sup>Department of Chemistry, Faculty of Science, University of Zagreb, Horvatovac 102a, 10000 Zagreb, Croatia, and <sup>2</sup>Department of Chemistry, Portland State University, P.O. Box 751, Portland OR 97207, <sup>3</sup>Department of Biochemistry & Molecular Biology, Oregon Health & Sciences University, 3181 SW Sam Jackson Park Road, Portland OR 97239

**Table S1.** Parallel formation of AMP and aa-tRNA<sup>Val</sup> by wild-type and mutant *E. coli* ValRS.

|                    | $k_{\text{AMP}}^a / \text{s}^{-1}$ | $k_{\text{aa-tRNA}}^a / \text{s}^{-1}$ | $k_{\text{AMP}} / k_{\text{aa-tRNA}}$ | $k_{\text{ed}}^b / \text{s}^{-1}$ | $k_{\text{ed-tRNA}}^a / \text{s}^{-1}$ | $k_{\text{ed}} / k_{\text{ed-tRNA}}$ |
|--------------------|------------------------------------|----------------------------------------|---------------------------------------|-----------------------------------|----------------------------------------|--------------------------------------|
| <b>wt + Thr</b>    | $6.7 \pm 1.15$                     | $0.044 \pm 0.005$                      | 149                                   | 6.655                             | $0.40 \pm 0.04$                        | 16.6                                 |
| <b>D286A + Thr</b> | $1.29 \pm 0.19$                    | $0.9 \pm 0.08$                         | 1.43                                  | 0.39                              | $0.40 \pm 0.06$                        | 0.975                                |
| <b>wt + Val</b>    | $1.78 \pm 0.26$                    | $1.6 \pm 0.04$                         | 1.1                                   | 0.18                              | $0.007 \pm 0.002$                      |                                      |
| <b>D286A + Val</b> | $1.44 \pm 0.34$                    | $1.19 \pm 0.13$                        | 1.2                                   | 0.24                              | $0.005 \pm 0.002$                      |                                      |

The values represent the mean  $\pm$  S.D. of at least three independent experiments.

The reaction conditions are as described in the main text.

<sup>a</sup>  $k_{\text{AMP}}$  and  $k_{\text{ed-tRNA}}$  represent measured rate constants for formation of AMP in the presence and absence of tRNA<sup>Val</sup>, respectively.  $k_{\text{aa-tRNA}}$  represents rate constant for formation of aa-tRNA<sup>Val</sup> measured under the same conditions as  $k_{\text{AMP}}$ .

<sup>b</sup>  $k_{\text{ed}}$  represents rate constant for tRNA-dependent editing and is calculated as a difference between the rate constant for AMP formation in the presence of tRNA<sup>Val</sup> and the rate constant for aa-tRNA<sup>Val</sup> formation.

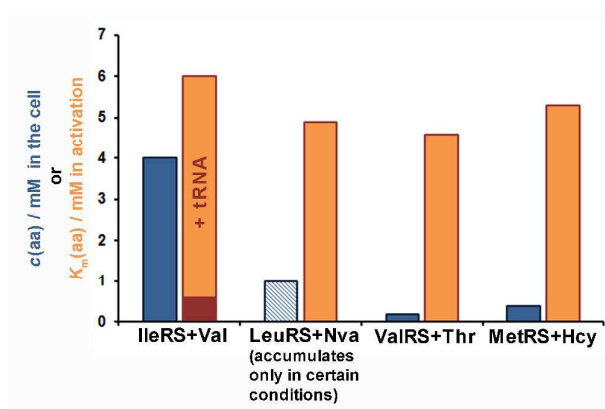

**Figure S1.** Comparison of the  $K_m$  values in the activation of noncognate amino acids with their concentration in the cell. Data are presented only for for class I editing aaRS. For IleRS,  $K_m$  in activation for valine is 0.46 - 1 mM (dark red rectangle), but rises approximately 10-fold in the presence of tRNA (Dulic et al, 2010, Cveticic and Gruic, unpublished results).  $K_m$ 's are as published in Cveticic et al, 2012, Dulic et al, 2010, Kim et al, 1993. Concentrations of amino acids are as published in Bennet et al, 2009 and Soini et al, 2008.

#### References:

- Bennett, B. D., Kimball, E. H., Gao, M., Osterhout, R., Van Dien, S. J., and Rabinowitz, J. D. (2009) Absolute metabolite concentrations and implied enzyme active site occupancy in *Escherichia coli*, *Nat. Chem. Biol.* 5, 593-599.
- Cveticic, N., Perona, J. J., and Gruic-Sovulj, I. (2012) Kinetic partitioning between synthetic and editing pathways in class I aminoacyl-tRNA synthetases occurs at both pre-transfer and post-transfer hydrolytic steps, *J. Biol. Chem.* 287, 25381-25394.
- Dulic, M., Cveticic, N., Perona, J. J., and Gruic-Sovulj, I. (2010) Partitioning of tRNA-dependent editing between pre- and post-transfer pathways in class I aminoacyl-tRNA synthetases, *J. Biol. Chem.* 285, 23799-23809.
- Kim, H. Y., Ghosh, G., Schulman, L. H., Brunie, S., and Jakubowski, H. (1993) The relationship between synthetic and editing functions of the active site of an aminoacyl-tRNA synthetase, *Proc. Natl. Acad. Sci. U. S. A.* 90, 11553-11557.
- Soini, J., Falschlehner, C., Liedert, C., Bernhardt, J., Vuoristo, J., and Neubauer, P. (2008) Norvaline is accumulated after a down-shift of oxygen in *Escherichia coli* W3110, *Microb. Cell Fact.* 7:30.
